# Supplementary material for: The Use of Glucagon-like Peptide-1 Receptor Agonists in Patients with Type 2 Diabetes Mellitus Does Not Increase the Risk of Pancreatic Cancer: A U.S.-Based Cohort Study
Source: MDPI journal article supplement (doi:10.3390/cancers16091625), 2024-04-23
Supplement: s1 [file s1]

*Supplementary Material: ICD-10 and Identification Codes Used in Methodology*

| • <i>Patient Diagnoses</i> |                                                          |                 |
|----------------------------|----------------------------------------------------------|-----------------|
| T2DM                       | Type 2 diabetes mellitus                                 | ICD-10 E11      |
| Personal Carrier           | Genetic carrier of other disease                         | ICD-10 Z15.09   |
|                            | Genetic susceptibility to other malignant neoplasm       | ICD-10 Z14.8    |
| Genome                     | NOTCH1                                                   | GENE 7881       |
| Genome                     | BRCA1                                                    | GENE:1100       |
| Genome                     | BRCA2                                                    | GENE:1101       |
| Genome                     | CDKN2A                                                   | GENE:1787       |
| Genome                     | KRAS                                                     | TNX:386601      |
| Genome                     | MEN1                                                     | GENE:7010       |
| Genome                     | MLH1                                                     | GENE:7127   var |
| Genome                     | MSH2                                                     | GENE:7325   var |
| Genome                     | NOTCH1                                                   | GENE:7881       |
| Genome                     | PALB2                                                    | GENE:26144      |
| Genome                     | PMS2                                                     | GENE:9122       |
| Genome                     | PRSS1S                                                   | LNC:21692-9     |
| Genome                     | VHL                                                      | GENE:12687      |
| Pancreatic Cyst            | Cyst of pancreas                                         | ICD-10 K86.2    |
| Family History             | Family history of malignant neoplasm of digestive organs | ICD-10 Z80.0    |
| Family Carrier             | Family history of carrier of genetic disease             | ICD-10 Z84.81   |
| • <i>Outcomes</i>          |                                                          |                 |
| Pancreatic Cancer          | Malignant neoplasm of pancreas                           | ICD-10 C25      |

*ICD-10: International Classification of Diseases 10th Revision; T2DM: Type 2 Diabetes Mellitus*
